# Supplementary material for: Risk stratification model for patients with stage I invasive lung adenocarcinoma based on clinical and pathological predictors
Source: PubMed Central journal article supplement — Transl Lung Cancer Res. 2021 May;10(5):2205–17. doi: 10.21037/tlcr-21-393 (PMC8182714; doi:10.21037/tlcr-21-393), 2021-05
Supplement: tlcr-10-05-2205-supplementary.pdf [file tlcr-10-05-2205-supplementary.pdf]

**Table S1** The relationship between the predominant patterns of adenocarcinoma and the proposed new pathological classification of IADC.

| New pathology | LEP | ACN | PAP | SOL | MIP | Others | Total |
|---------------|-----|-----|-----|-----|-----|--------|-------|
| nLEP          | 61  | 0   | 0   | 0   | 0   | 2      | 63    |
| nACN          | 25  | 247 | 0   | 0   | 0   | 4      | 276   |
| nPAP          | 15  | 233 | 396 | 0   | 0   | 4      | 648   |
| nSOL          | 2   | 66  | 17  | 52  | 0   | 0      | 137   |
| nMIP          | 0   | 12  | 17  | 0   | 6   | 1      | 36    |
| Others        | 0   | 0   | 0   | 0   | 0   | 36     | 36    |
| Total         | 103 | 558 | 430 | 52  | 6   | 47     | 1196  |

Abbreviations: LEP, lepidic-predominant ADC; ACN, acinar-predominant ADC; PAP, papillary-predominant ADC; SOL, solid-predominant ADC; MIP, micropapillary-predominant ADC; nLEP, new classification of LEP; nACN, new classification of ACN; nPAP, new classification of PAP; nSOL, new classification of SOL; nMIP, new classification of MIP.

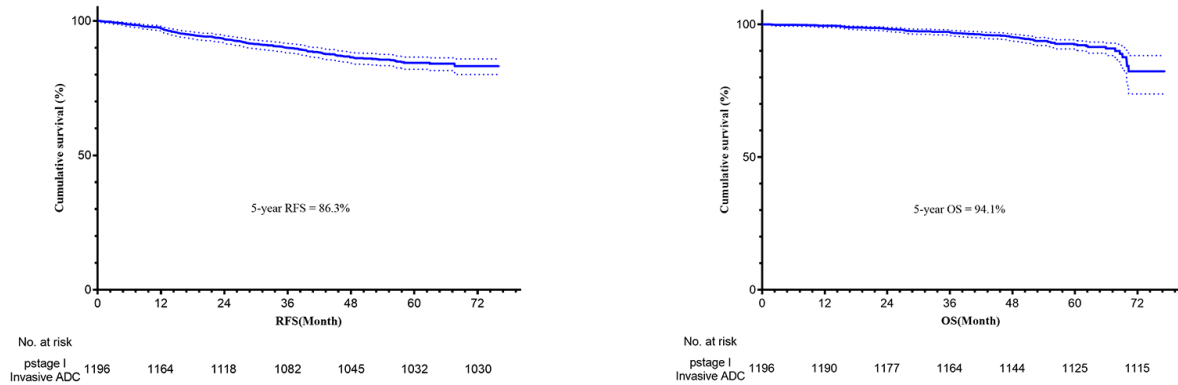

**Figure S1** Recurrence-free survival and overall survival in the primary cohort. Kaplan-Meier curve for relapse-free survival and overall survival in 1,196 patients with resected stage I IADC.

**Table S2** Standardized risk score coefficients based on overall survival.

| Overall survival                   | Scores      |     |     |
|------------------------------------|-------------|-----|-----|
|                                    | 0           | 1   | 2.4 |
| Smoking history                    | No          | Yes |     |
| 8 <sup>th</sup> TNM classification | IA1/IA2/IA3 |     | IB  |

Abbreviations: TNM, tumor, node, metastasis.

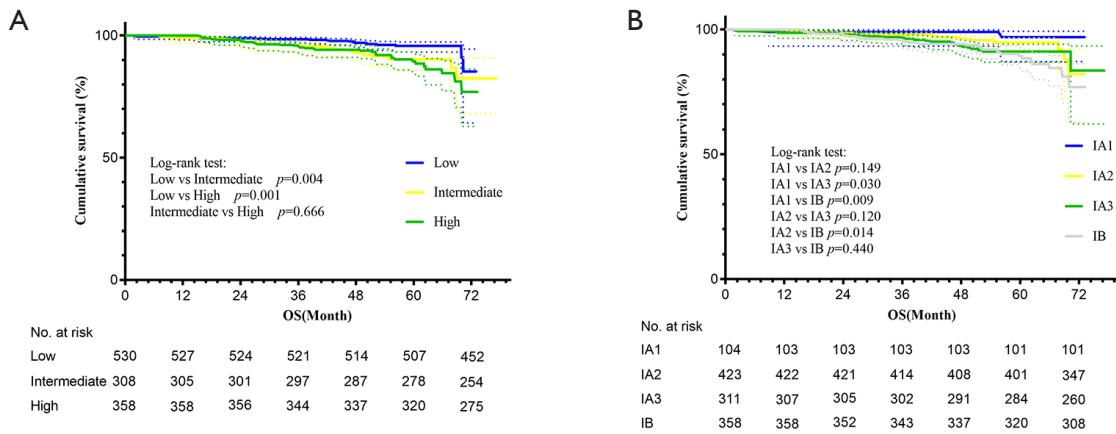

**Figure S2** Overall survival according to the risk stratification model (A) and the eighth TNM classification (B). Kaplan-Meier curves for overall survival in 1,196 patients with resected stage I ADC, plotted by risk stratification model and the eighth TNM Classification, respectively.

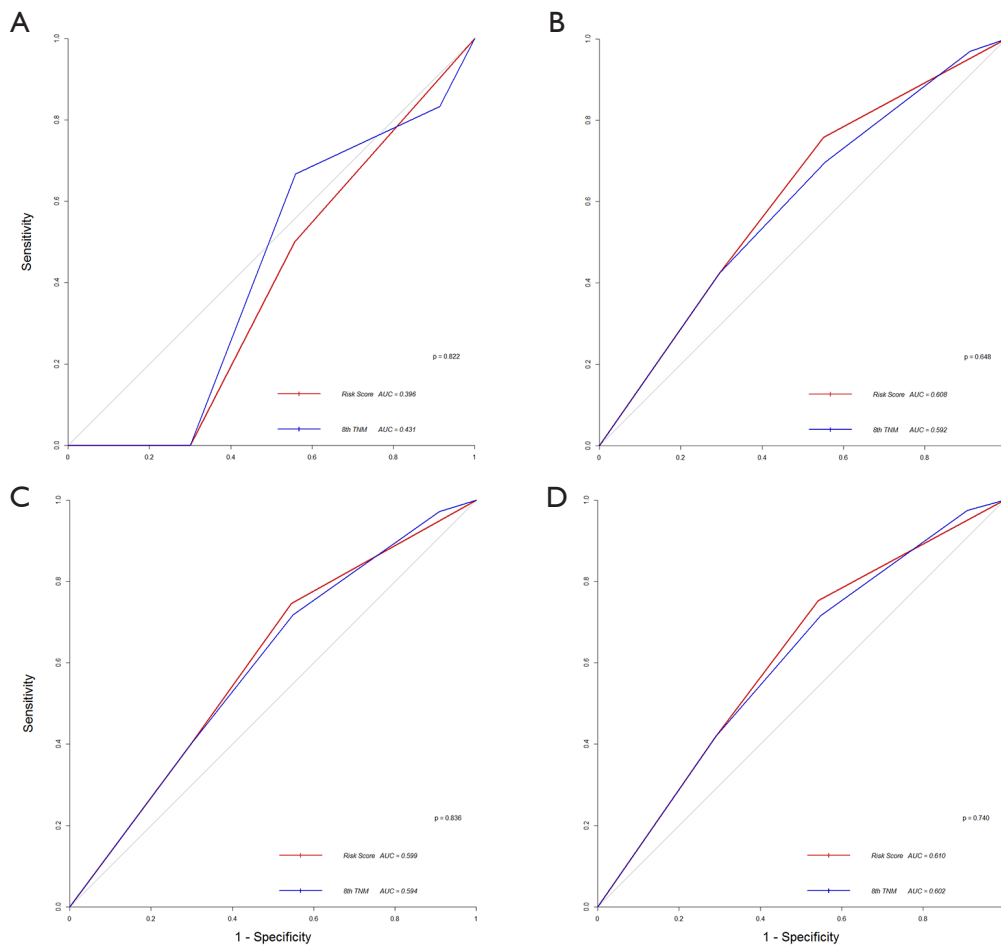

**Figure S3** Prognostic performance comparison between risk stratification model and the eighth TNM classification for overall survival. AUC comparison between the risk model and TNM classification in 1-year OS (A), 3-year OS (B), 5-year OS (C), and total OS (D).
